# Supplementary material for: Swine Model of Biofilm Infection and Invisible Wounds
Source: PubMed Central journal article supplement — J Vis Exp. Author manuscript; Available in PMC 2024 Jun 16. (PMC10655070; doi:10.3791/65301), 2023-06-16
Supplement: NIHMS1942481-supplement-Materials_List.pdf [file NIHMS1942481-supplement-Materials_List.pdf]

# Swine Model of Biofilm Infection and Invisible Wounds

Mohamed El Masry<sup>1</sup>, Pramod Bhasme<sup>1</sup>, Shomita S. Mathew-Steiner<sup>1</sup>, Jessica Smith<sup>1</sup>, Thomas Smeenge<sup>1</sup>, Sashwati Roy<sup>1</sup>, Chandan K. Sen<sup>1</sup>

<sup>1</sup>Indiana Center for Regenerative Medicine & Engineering, Indiana University Health Comprehensive Wound Center, Department of Surgery, Indiana University School of Medicine

## Corresponding Author

Chandan K. Sen  
cksen@iu.edu

## Citation

El Masry, M., Bhasme, P., Mathew-Steiner, S.S., Smith, J., Smeenge, T., Roy, S., Sen, C.K. Swine Model of Biofilm Infection and Invisible Wounds. *J. Vis. Exp.* (196), e65301, doi:10.3791/65301 (2023).

## Date Published

June 16, 2023

## DOI

10.3791/65301

## URL

jove.com/video/65301

## Materials

| Name                           | Company                   | Catalog Number     | Comments                                     |
|--------------------------------|---------------------------|--------------------|----------------------------------------------|
| <b>Sedation</b>                |                           |                    |                                              |
| Ketamine                       | Zoetis                    | 10004027           | 100mg/ml                                     |
| Telazol                        | Zoetis                    | 106-111            | 100mg/ml                                     |
| Xylazine                       | Pivetal                   | 04606-6750-02      | 100mg/ml Anased                              |
| 3ml syringe w/ 20g needle      | Covidien-Monoject         | 8881513033         |                                              |
| Winged infusion set 21g        | Jorgensen Labs            | J0454B             |                                              |
| <b>Anesthetic</b>              |                           |                    |                                              |
| Isoflurane                     | Pivetal                   | 21295097           |                                              |
| <b>Surgery</b>                 |                           |                    |                                              |
| Hair clippers                  | Wahl                      | 8787-450A          |                                              |
| Nair                           | Church and Dwight Co. Inc | 70506572           |                                              |
| Chlorhexidine Solution         | First Priority Inc.       | 179925722          |                                              |
| 70% Isopropyl Alcohol          | Uline                     | S-17474            |                                              |
| 0.9% Saline Solution           | ICU Medical               | RL-7282            |                                              |
| Non-woven gauze                | Pivetal                   | 21295051           |                                              |
| Paper tape                     | McKesson                  | 455531             |                                              |
| 2" Elastic tape                | Pivetal                   | 21300869           |                                              |
| 18-22g Intravenous Angiocath   | SurVet                    | (01)14806017512306 |                                              |
| Spay hook                      | Jorgensen Labs            | J0112A             |                                              |
| Sterile lube                   | McKesson                  | 16-8942            |                                              |
| Laryngoscope                   | Jorgensen Labs            | J0449S             |                                              |
| Roll gauze                     | Pivetal                   | 21295032           |                                              |
| Endotracheal tube (7-9mm)      | Covidien                  | 86112              | Shiley Hi-Lo Oral Nasal Tracheal Tube Cuffed |
| 15gtt/ml IV administration set | ICU Medical               | 12672-28           |                                              |
| LRS 1000ml bag                 | ICU Medical               | 07953-09           |                                              |
| Three Quarter Drape Sheet      | McKesson                  | 16-i80-12110G      |                                              |
| <b>Analgesia</b>               |                           |                    |                                              |

|                                          |                                              |                    |                 |
|------------------------------------------|----------------------------------------------|--------------------|-----------------|
| Buprenorphine                            | RX Generics                                  | 42023-0179-05      | 0.3mg/ml        |
| Fentanyl Transdermal                     |                                              |                    |                 |
| Carprofen                                | 21294548                                     | Pivotal            | 50mg/ml Levafen |
| <b>Bandaging</b>                         |                                              |                    |                 |
| Transparent film dressing 26x30          | Genadyne Biotechnologies                     | A4-S00F5           |                 |
| Film dressing 4 x 4-3/4 Frame Style      | McKesson                                     | 886408             |                 |
| Vetrap                                   | 3M                                           | 1410BK BULK        |                 |
| Elastic tape 4"                          | Pivotal                                      | 21300931           |                 |
| Kerlix Roll Gauze                        | Cardinal Health                              | 3324               |                 |
| <b>Imaging</b>                           |                                              |                    |                 |
| Canon EOS 80D                            | Canon                                        | 1263C004           |                 |
| Speedlight 600EX II-RT                   | Canon                                        | 1177C002           |                 |
| EFS 17-55mm Ultrasonic                   | Canon                                        | 1242B002           |                 |
| GE Logiq E9                              | GE                                           | 5197104-2          |                 |
| ML6-15 Probe                             | GE                                           | 5199103            |                 |
| PeriCamPSI                               | Perimed                                      | 90-00070           |                 |
| DermaLab                                 | Cortex Technologies Inc                      | 4608D78            |                 |
| <b>Biopsy/Tissue Collection</b>          |                                              |                    |                 |
| 6mm punch biopsy                         | Integra Lifesciences                         | 33-36              |                 |
| bupivacaine 0.5%                         | Auromedics Pharma                            | 55150017030        |                 |
| Size 10 Disposable Scalpel               | McKesson                                     | 16-63810           |                 |
| Dissection scissors                      | Pivotal                                      | 21294806           |                 |
| Rat tooth thumb tissue forceps           | Aesculap                                     | BD512R             |                 |
| Non-adherent Dressing                    | Covidien                                     | 2132               | Telfa           |
| 50ml Conical tube                        | Falcon                                       | 352070             |                 |
| Eppendorf/microcentrifuge tube           | Fisherbrand                                  | 02-681-320         |                 |
| OCT Cassette                             |                                              |                    |                 |
| Non Woven Gauze 4x4                      | Pivotal                                      | 21295051           |                 |
| <b>Inoculum</b>                          |                                              |                    |                 |
| Low salt LB agar                         | Invitrogen                                   | 22700-025          |                 |
| Low salt LB broth                        | Fisher scientific                            | BP1427-500         |                 |
| Petri plate                              | Falcon                                       | REF-351029         |                 |
| Polypropylene round bottom tubes (14 ml) | Falcon                                       | REF-352059         |                 |
| Pseudomonas Agar Base (Dehydrated)       | Thermo Scientific                            | OXCM0559B          |                 |
| LB Agar, powder (Lennox L agar)          | Thermo Fisher Scientific (Life Technologies) | 22700025           |                 |
| Gibco™ DPBS, calcium, magnesium          | Gibco                                        | 14040133           |                 |
| <b>Euthanasia</b>                        |                                              |                    |                 |
| 18-22g Intravenous Angiocath             | SurVet                                       | (01)14806017512306 |                 |
| Fatal Plus                               | Vortech Pharmaceuticals                      | 9373               |                 |
